# Supplementary material
Source: PubMed Central journal article supplement (PMC6604642)
Supplement: NIHMS1523675-supplement-supplement.pdf [file NIHMS1523675-supplement-supplement.pdf]

## Supplemental Material for “Topological phases with long-range interactions”

Zhe-Xuan Gong,<sup>1,2</sup> Mohammad F. Maghrebi,<sup>1,2</sup> Anzi Hu,<sup>1,3</sup> Michael L. Wall,<sup>4</sup> Michael Foss-Feig,<sup>1,2</sup> and Alexey V. Gorshkov<sup>1,2</sup>

<sup>1</sup>Joint Quantum Institute, NIST/University of Maryland, College Park, Maryland 20742, USA

<sup>2</sup>Joint Center for Quantum Information and Computer Science,

NIST/University of Maryland, College Park, Maryland 20742, USA

<sup>3</sup>Department of Physics, American University, Washington, DC 20016, USA

<sup>4</sup>JILA, NIST/University of Colorado, Boulder, CO 80309, USA

In this supplemental material, we give a detailed analytical field theory calculation on how to obtain the  $1/r^{\alpha+4}$  long-distance tail in the ground-state spin-spin correlation  $C_{ij} = \langle S_i^z S_j^z \rangle_0$  [where  $\langle \dots \rangle_m$  denotes the expectation value in the state  $|m\rangle$  defined in Fig. (1a) of the main text] of  $H_\alpha$  [defined in the Eq. (1) of the main text], as well as the  $1/r^{\alpha+2}$  long-distance tail in the edge excitation amplitude  $\langle S_i^z \rangle_1$  of  $H_\alpha$ . As we stated in the main text, these power-law tails come from the non-analytic  $O(|q|^{\alpha-1})$  term in the dispersion of the field  $\mathbf{l}(q)$ . Directly calculating the corrections due to these terms turns out to be complicated. Here we adopt a different field theoretic approach that is simpler in obtaining the long-distance behavior of  $C_{ij}$  and  $\langle S_i^z \rangle_1$ .

This alternative field theory is based on decomposing each spin-1 into two spin-1/2's and mapping them to two bosonic fields  $\psi_{1,2}$  [1]. This field theory was originally designed for a nearest-neighbor spin-1 XXZ chain with ferromagnetic XY interaction. We work with a long-range interacting version of such a model:

$$\tilde{H}_\alpha = - \sum_{i>j} \frac{(-1)^{i-j-1}}{(i-j)^\alpha} (S_i^x S_j^x + S_i^y S_j^y) + \sum_{i>j} \frac{S_i^z S_j^z}{(i-j)^\alpha}, \quad (\text{S1})$$

which is equivalent to  $H_\alpha$  upon flipping every other spin in the  $x$ - $y$  plane.

Following Ref. [1], we map each spin-1 to two fields  $\psi_{1,2}(x)$  and their conjugate fields  $X_{1,2}(x)$  as:

$$S^+(x) = \frac{1}{\pi} e^{-iX_1(x)/\sqrt{2}} \left\{ \cos \left[ \frac{X_2(x)}{\sqrt{2}} \right] + e^{i\pi x} e^{-i\sqrt{2}\psi_1(x)} \cos \left[ \sqrt{2}\psi_2(x) + \frac{X_2(x)}{\sqrt{2}} \right] \right\}, \quad (\text{S2})$$

$$S^z(x) = -\frac{\sqrt{2}}{\pi} \frac{\partial \psi_1}{\partial x} + \frac{2}{\pi} e^{i\pi x} \cos \left[ \sqrt{2}\psi_2(x) \right] \cos \left[ \sqrt{2}\psi_1(x) \right]. \quad (\text{S3})$$

In the  $\alpha \rightarrow \infty$  limit, and keeping only the most relevant terms, the above Hamiltonian gets mapped to two commuting parts  $H_1 + H_2$  [1]:

$$H_1 = \frac{1}{2\pi} \int dx \left[ \left( \frac{\partial X_1}{\partial x} \right)^2 + K_1^2 \left( \frac{\partial \psi_1}{\partial x} \right)^2 \right] + \frac{1}{\pi^2} \int dx \mu_1 \cos \left[ \sqrt{8}\psi_1(x) \right], \quad (\text{S4})$$

$$H_2 = \frac{1}{2\pi} \int dx \left[ \left( \frac{\partial X_2}{\partial x} \right)^2 + K_2^2 \left( \frac{\partial \psi_2}{\partial x} \right)^2 \right] + \frac{1}{\pi^2} \int dx \mu_2 \cos \left[ \sqrt{8}\psi_2(x) \right] + \frac{1}{\pi^2} \int dx \mu_3 \cos \left[ \sqrt{2}X_2(x) \right], \quad (\text{S5})$$

where  $\mu_1 = \mu_2 = \mu_3 = -1$ ,  $K_1 = \sqrt{1 + \frac{6}{\pi}}$ , and  $K_2 = \sqrt{1 + \frac{2}{\pi}}$ .

The renormalization group (RG) flow equations for  $\mu_{1,2,3}$  under the scaling change  $x \rightarrow xe^l$  are given by

$$\frac{d\mu_1(l)}{dl} = (2 - 2/K_1) \mu_1(l), \quad \frac{d\mu_2(l)}{dl} = (2 - 2/K_2) \mu_2(l), \quad \frac{d\mu_3(l)}{dl} = (2 - K_2/2) \mu_3(l). \quad (\text{S6})$$

Therefore, the term  $\cos(\sqrt{8}\psi_1)$  in Eq. (S4) is a relevant operator which gives rise to a gap, and one similarly finds the field  $\psi_2$  to be gapped. This picture is consistent with the gapped excitations predicted by the nonlinear sigma model used in the main text.

For a finite  $\alpha > 0$ , let us first consider the effect of the long-range  $S_i^x S_j^x + S_i^y S_j^y$  interactions. Using Eq. (S2), we find that the most relevant terms in the RG sense are given by

$$\int dx dy \left\{ -\frac{1}{\pi} \frac{1}{|x-y|^\alpha} \cos \left[ \frac{X_1(x) - X_1(y)}{\sqrt{2}} + \pi(x-y) \right] \cos \frac{X_2(x)}{\sqrt{2}} \cos \frac{X_2(y)}{\sqrt{2}} + \text{less relevant terms} \right\}. \quad (\text{S7})$$

The oscillatory character of these terms makes them irrelevant beyond the wavelength of the oscillation, i.e.  $|x-y| \gtrsim 1$  [2]. We can thus disregard their effects at long distances.

Next we consider the long-range  $S_i^z S_j^z$  interactions. Using Eq. (S3), we obtain

$$\int dx dy \frac{S^z(x) S^z(y)}{|x-y|^\alpha} = \int dx dy \left[ \frac{2}{\pi^2} \frac{\partial \psi_1}{\partial x} \frac{1}{|x-y|^\alpha} \frac{\partial \psi_1}{\partial y} + \text{oscillating terms} \right]. \quad (\text{S8})$$

The oscillating terms have the phase  $e^{i\pi(x-y)}$  and thus are similarly suppressed; the first term in Eq. (S8) will change how ground-state correlations decay. This occurs because it contributes to the field  $\psi_1(q)$  a dispersion proportional to  $|q|^{\alpha+1}$ , which is non-analytic and will generate a power-law decay of the correlations of  $\psi_1(x)$  in the ground state. Formally, by expanding the  $\mu_1 \cos[\sqrt{8}\psi_1(x)]$  term in Eq. (S4) to second order in  $\psi_1(x)$ , we can write the full dispersion for  $\psi_1(q)$  as  $\epsilon_1(q) = \mu_1 + q^2 + |q|^{\alpha+1}$  (ignoring constant coefficients). Consequently, the correlation function in the ground state  $|0\rangle$  at large separation  $|x-y|$  is given by

$$\langle \psi_1(x) \psi_1(y) \rangle_0 \propto \int \frac{e^{iq(x-y)}}{\epsilon_1(q)} \propto \frac{1}{|x-y|^{\alpha+2}}. \quad (\text{S9})$$

Using Eq. (S3), we end up with  $\langle S^z(x) S^z(y) \rangle_0 \propto 1/|x-y|^{\alpha+4}$  as stated in the main text.

Next, we calculate  $\langle S^z(x) \rangle$  in the edge excited state  $|1\rangle$  by using the edge-bulk coupling Hamiltonian  $H_c = \sum_{i=2}^{L-1} \mathbf{S}_i \cdot \left[ \frac{\tau_L}{(i-1)^\alpha} + \frac{\tau_R}{(L-i)^\alpha} \right]$  defined in the main text. Rewriting  $H_c$  in the continuum limit, we have

$$H_c = \frac{1}{2} \int dx \left[ \frac{1}{(x-1)^\alpha} + \frac{1}{(L-x)^\alpha} \right] S^z(x). \quad (\text{S10})$$

Under the mapping Eq. (S3), and ignoring oscillating terms, we have

$$H_c \propto \int dx \left[ \frac{1}{(x-1)^{\alpha+1}} - \frac{1}{(L-x)^{\alpha+1}} \right] \psi_1(x). \quad (\text{S11})$$

Applying first order perturbation theory to  $H_c$ , we find that  $\langle \psi_1(q) \rangle_1$  is given by:

$$(q^2 + |q|^{\alpha+1} + \mu_1) \langle \psi_1(q) \rangle_1 \propto (e^{-iq} - e^{iqL}) |q|^\alpha. \quad (\text{S12})$$

As a result, we obtain  $\langle \psi_1(q) \rangle_1 \propto (e^{-iq} - e^{iqL}) |q|^\alpha + \text{higher order terms}$ . For spins far way from both ends, we obtain

$$\langle S^z(x) \rangle_1 \propto \frac{1}{(x-1)^{\alpha+2}} + \frac{1}{(L-x)^{\alpha+2}} + \text{higher-order terms}. \quad (\text{S13})$$

[1] H. J. Schulz, *Phys. Rev. B* **34**, 6372 (1986).

[2] T. Giamarchi, *Quantum physics in one dimension* (Oxford University Press, 2004).
